# Supplementary material for: Proximate cues to phases of movement in a highly dispersive waterfowl, Anas superciliosa
Source: PubMed Central journal article supplement (PMC4556217; doi:10.1186/s40462-015-0048-3), 2015-09-01
Supplement: 40462_2015_48_MOESM1_ESM.pdf [file 40462_2015_48_MOESM1_ESM.pdf]

## 1 **Supplementary Material**

McEvoy, J.F., Roshier, D.A., Ribot, R.F.H., and Bennett, A.T.D., “Proximate cues to phases of movement in a highly dispersive waterfowl, *Anas superciliosa*”

Movement Ecology 000: 000 – 000

## 2 **Appendix 1**

### 3 *Behavioural Change Point Analysis*

4 Behavioural Change Point Analysis (BCPA), following Gurarie et al [40], was used to detect  
5 transitions in the movement behaviour of individual birds. BCPA uses velocity, the angle of  
6 the trajectories connecting successive GPS points, distance moved between GPS fixes (step  
7 length) and produces a variable called *persistence velocity* (velocity x Cos(turning angle) )  
8 which represents the magnitude and tendency of a movement to persist in a given direction.  
9 A moving window is scanned along the time series of animal locations and maximum  
10 likelihood methods are used to detect significant change points in the characteristics of the  
11 movement behaviour. Change points are detected by selecting the most likely model that  
12 explains the changes in three properties of the time series of  $V_p$  (mean, variance and  
13 autocorrelation) between the current window and the previous window. At each change  
14 point the model chosen to make the distinction is provided. There are 8 potential models  
15 which can be chosen, M0-M7. M0 represents the null model where there is no change in any  
16 of the three parameters. M1, M2 and M3 represent one parameter changing significantly  
17 while the other two parameters remain constant; M4, M5 and M6 have one equality each  
18 while two other parameters change and M7 is the most alternate hypothesis, in which all  
19 parameter values change at the change point. A moving window covering 24 hours of  
20 movement was used to match the temporal scale at which weather data was collected.

21 BCPA analysis was carried out in the R programming environment [41].  
22  
23 The significant changes in behaviour that mark the beginning and end of each phase were  
24 detected automatically by BCPA. The subsequent characterisation of these phases was carried  
25 out in two ways. Firstly by looking at the model that BCPA chose at the change point that  
26 begins the phase. At all change points either M2 or M4 was selected as the most likely model.  
27 If M2 is selected this represents a change in the variance around the mean but no concurrent  
28 change in either the mean value or the autocorrelation value, if M4 is selected this indicates  
29 that both the mean value and variance have changed but the autocorrelation value has not.  
30 BCPA also provides an indication of the direction of the changes in these parameters. Phase  
31 that showed a significant increase in variance and either no change or a decrease in mean  $V_p$   
32 were marked as 'Exploratory'. Movement phases that have low persistence velocity,  
33 increased variance and low autocorrelation represent movements that are highly variable in  
34 speed and duration of each step and include many changes of direction. This characterisation  
35 of the phases was confirmed by visually inspecting the characteristics of the BCPA graph  
36 within each phase for which M2 and M4 were selected at the beginning of the phase.

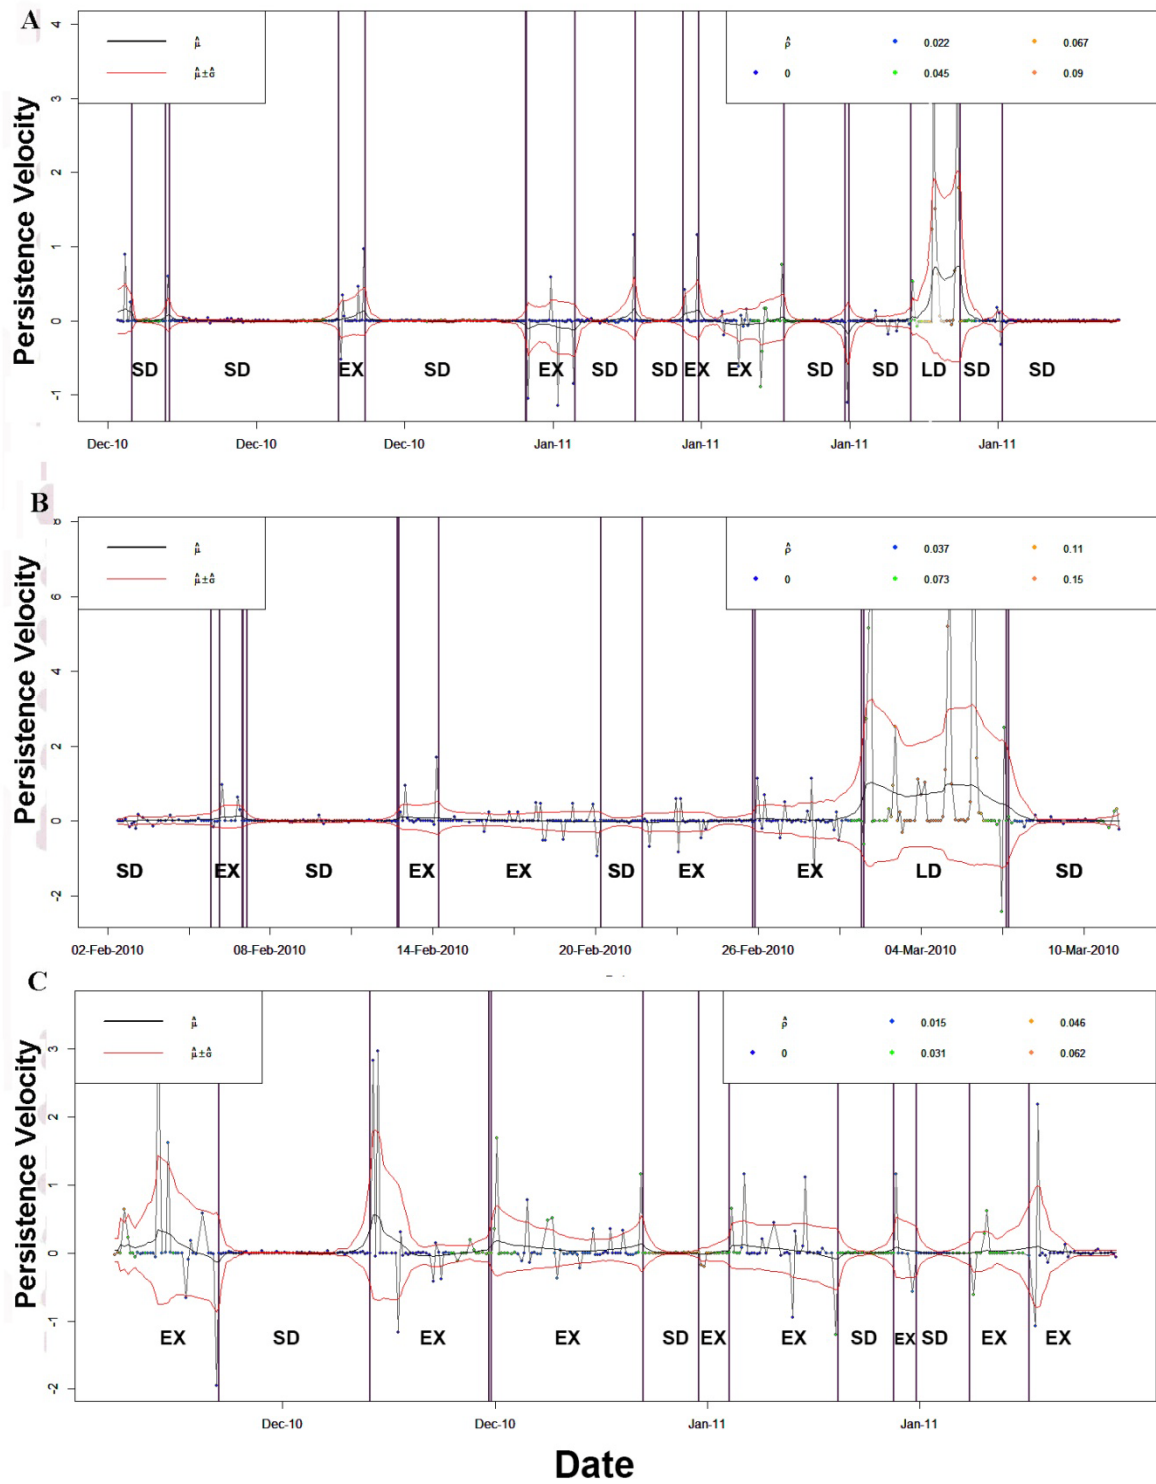

37

38 **Figure A1:** Three representative examples of Behavioural Change Point Analysis (BCPA)

39 for three individual Pacific black duck. Phases of movement behaviour are labelled as SD

40 (Sedentary), EX (exploratory) and LD oriented long distance movement. The Y axis shows

41 'persistence velocity' or the magnitude and tendency of a movement to persist in a given  
42 direction. The X axis shows the date. The black line shows changes in the mean value of  
43 persistence velocity ( $\hat{\mu}$ ) along the time series an increase in which corresponds to faster and  
44 more oriented movement. Red lines indicate variability around the mean ( $\hat{\sigma}$ ) an increase in  
45 which indicates a more variable, undirected movement pattern. The points in the time series  
46 are coloured according to the measure of autocorrelation between points ( $\rho$ ). Highly oriented  
47 movements show a greater degree of autocorrelation than meandering undirected movement.  
48 Purple vertical bars represent points where significant changes in movement behaviour were  
49 detected by BCPA. A) During the period shown this individual transitioned from a SD  
50 phase to an EX phase followed by a LD phase in mid-January 2011, before settling back to a  
51 prolonged SD phase. B) During the period shown this individual displayed a number of EX  
52 phases leading up to a brief LD phase in early March 2010. C) During the period shown this  
53 individual displayed numerous SD and EX phases and no LD phases were identified.

54

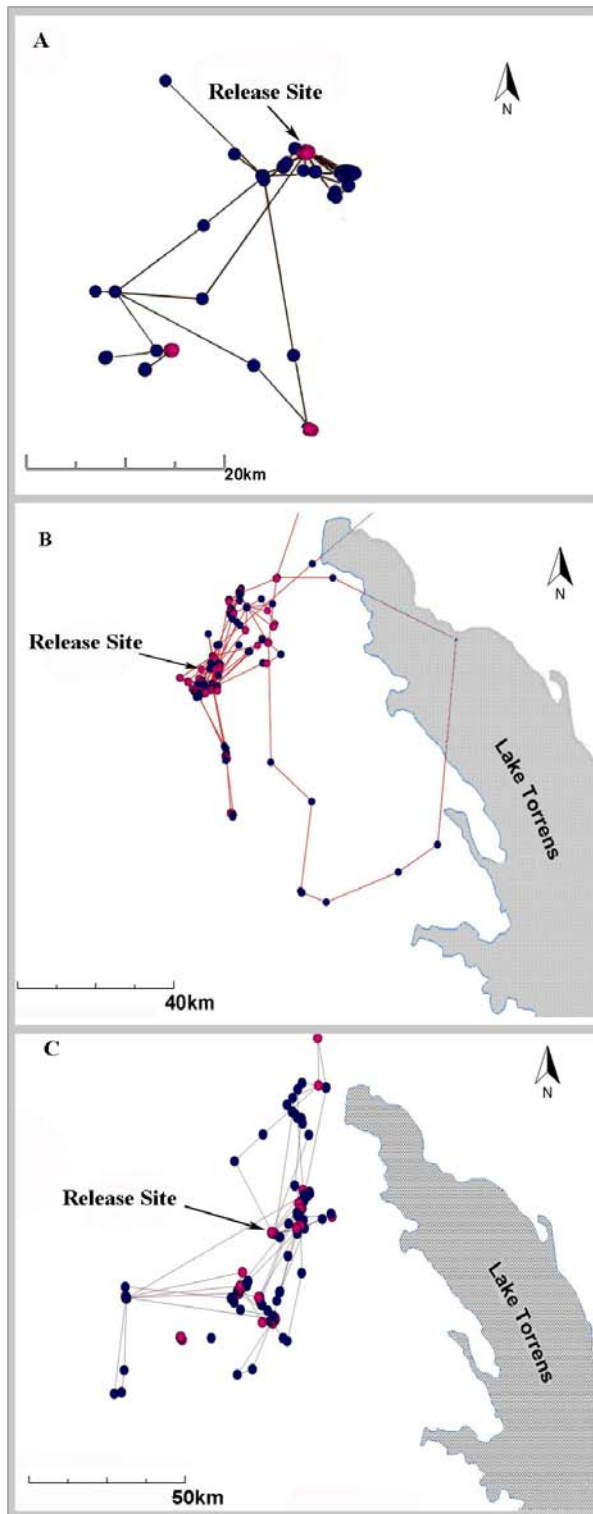

55

56 **Figure A2:** Sections of individual trajectories are taken from an exploratory phase of  
 57 movement behaviour as determined using BCPA. GPS fixes taken at night are marked in  
 58 blue; fixes taken during the day are marked in pink. Individuals can be seen exploring the  
 59 local landscape on a 20-60 km scale. The vast majority of exploratory behaviour takes place

60 at night. The large lake shown is the northern portion of Lake Torrens an extensive, dry salt  
61 lake with no viable habitat at the time.

62

63 **Table A1:** Summary of tracking data for all birds tracked during the study. N/A indicates either no in-flight records for that individual or the transmitter used  
64 (22g GPS) was not capable of recording altitude.

| <b>ID</b>         | <b>Maximum Daily Displacement (km)</b> | <b>Mean Daily Displacement (km)</b> | <b>Maximum Distance From The Origin (km)</b> | <b>Maximum Speed (km/h)</b> | <b>Maximum Altitude (m)</b> | <b>No. Days Tracked</b> |
|-------------------|----------------------------------------|-------------------------------------|----------------------------------------------|-----------------------------|-----------------------------|-------------------------|
| <b>96585</b>      | 18                                     | 2                                   | 26                                           | 39                          | 63                          | 29                      |
| <b>96586</b>      | 464                                    | 8                                   | 468                                          | 78                          | 40                          | 287                     |
| <b>103419</b>     | 25                                     | 1                                   | 34                                           | 78                          | 73                          | 185                     |
| <b>103420</b>     | 1                                      | 0                                   | 1                                            | 80                          | 17                          | 19                      |
| <b>103421</b>     | 14                                     | 2                                   | 22                                           | 68                          | 25                          | 40                      |
| <b>103422</b>     | 40                                     | 2                                   | 46                                           | 79                          | 65                          | 267                     |
| <b>103423</b>     | 59                                     | 4                                   | 64                                           | 87                          | 57                          | 69                      |
| <b>103424</b>     | 78                                     | 2                                   | 89                                           | 88                          | N/A                         | 151                     |
| <b>103425</b>     | 159                                    | 4                                   | 183                                          | 50                          | N/A                         | 297                     |
| <b>103426</b>     | 187                                    | 2                                   | 216                                          | 56                          | N/A                         | 205                     |
| <b>103427</b>     | 246                                    | 7                                   | 461                                          | 83                          | N/A                         | 149                     |
| <b>103428</b>     | 22                                     | 1                                   | 26                                           | 56                          | N/A                         | 209                     |
| <b>103421RED</b>  | 1                                      | 1                                   | 1                                            | 2                           | 18                          | 32                      |
| <b>103423RED</b>  | 56                                     | 3                                   | 36                                           | 71                          | 25                          | 207                     |
| <b>96585RED</b>   | 77                                     | 5                                   | 177                                          | 77                          | 17                          | 50                      |
| <b>96585RED_2</b> | 1                                      | 0                                   | 1                                            | 72                          | 31                          | 77                      |
| <b>96586RED</b>   | 9                                      | 1                                   | 19                                           | 80                          | 22                          | 94                      |
| <b>99020RED</b>   | 170                                    | 2                                   | 164                                          | 68                          | 35                          | 90                      |
| <b>99023RED</b>   | 140                                    | 9                                   | 178                                          | 2                           | 35                          | 49                      |
| <b>99035RED</b>   | 25                                     | 2                                   | 26                                           | 79                          | 57                          | 167                     |

65 **Table A2:** Examples of random forest models using different subsets of the total list of  
 66 predictor variables available. These models did not perform well and produced classification  
 67 accuracies close to 50% as would be expected by random chance.

| <b>Response</b>                                    | <b>Set of variables available for each tree</b>               | <b>Area under ROC curve – training</b> | <b>Area under ROC curve – validation</b> | <b>% Classification Accuracy - training</b> | <b>% Classification Accuracy - validation</b> |
|----------------------------------------------------|---------------------------------------------------------------|----------------------------------------|------------------------------------------|---------------------------------------------|-----------------------------------------------|
| <b>Initiation of exploratory flight</b>            | Bird ID<br>Tmin<br>Rain_3Wks<br>Rain_Week                     | 0.71                                   | 0.72                                     | 42                                          | 39                                            |
| <b>Initiation of exploratory flight</b>            | Bird ID<br>Tmin<br>Rain_3Wks<br>MinPress<br>NDVI              | 0.72                                   | 0.73                                     | 42                                          | 35                                            |
| <b>Initiation of long distance oriented flight</b> | Bird ID<br>Tmin<br>Tmax<br>Humidity<br>Rain_3Wks<br>Rain_Week | 0.89                                   | 0.68                                     | 53                                          | 52                                            |
| <b>Initiation of long distance oriented flight</b> | Bird ID<br>MinPress<br>Humidity<br>Rain_3Wks<br>Rain_Week     | 0.88                                   | 0.63                                     | 57                                          | 57                                            |

68
